# Supplementary material for: New Concept and Apparatus for Cytocentrifugation and Cell Processing for Microscopy Analysis
Source: MDPI journal article supplement (doi:10.3390/ijms22137098), 2021-07-01
Supplement: s1 [file s1]

## **Supplementary Data**

### **New concept and apparatus for cytocentrifugation and cell processing for microscopy analysis**

**Anna Ligasová\* and Karel Koberna\***

Institute of Molecular and Translational Medicine, Faculty of Medicine and Dentistry, Palacký University Olomouc, Hněvotínská 5, 779 00 Olomouc, Czech Republic; [anna.ligasova@upol.cz](mailto:anna.ligasova@upol.cz); [ka-rel.koberna@upol.cz](mailto:ka-rel.koberna@upol.cz)

\* Correspondence: [anna.ligasova@upol.cz](mailto:anna.ligasova@upol.cz) (AL); [karel.koberna@upol.cz](mailto:karel.koberna@upol.cz) (KK)

- 1. Supplementary Figures**
- 2. Supplementary Videos**

## 1. Supplementary Figures

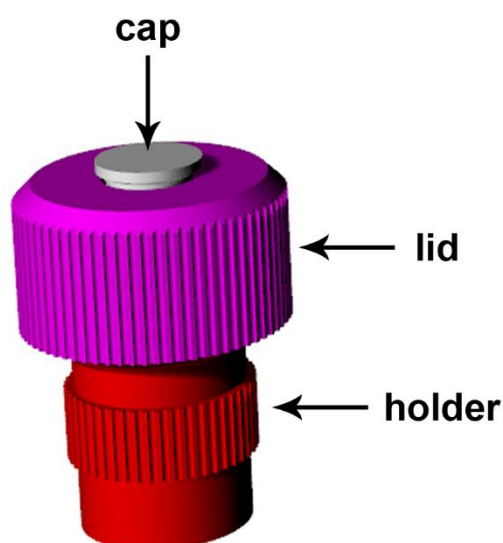

**Figure S1.** The cap. The CytoTrap can be furnished with the cap closing the opening of the insert during the centrifugation if necessary.

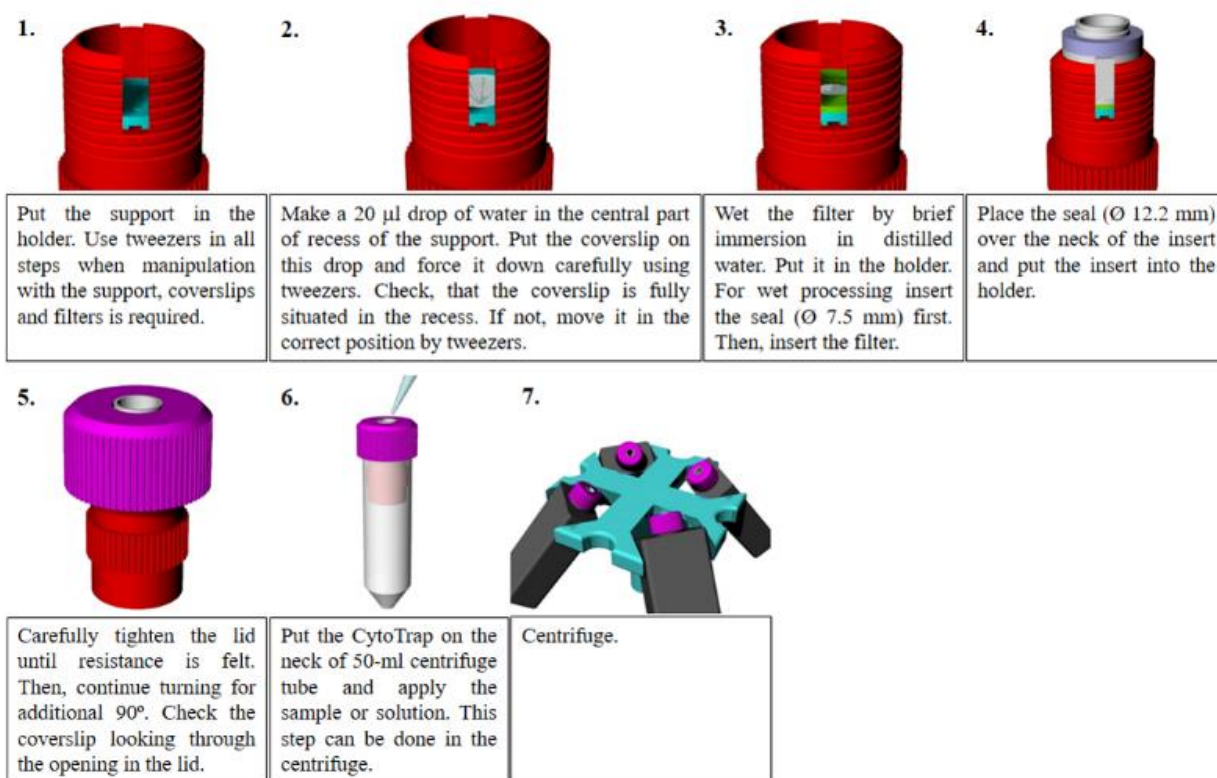

**Figure S2.** Description of the CytoTrap assembly. The particular steps of the CytoTrap assembly are shown.

## **2. Supplementary Videos**

### **Video S1. Assembly of the developed device**

The step-by-step assembly of the developed device used for the preparation of dry cytospin samples using a common centrifuge with a swing-out rotor.

### **Video S2. The use of the device in centrifuge**

The use of the developed device in a common centrifuge with a swing-out rotor is shown. The application of the samples is performed inside the centrifuge. The 50-ml centrifuge tube is used as a reservoir of the liquid waste.
